# Supplementary material for: Cortical Thinning, Functional Connectivity, and Mood-Related Impulsivity in Schizophrenia: Relationship to Aggressive Attitudes and Behavior
Source: Atypon-hosted journal article supplement (doi:10.1176/appi.ajp.2014.13111553), 2014-09-01
Supplement: 939_ds001.pdf [file 939_ds001.pdf]

**Table S1. Correlations between Impulsivity and Aggression Measures**

|                               | Urgency Scale                  |                               |                                |                               |                               | Impulsive/<br>Premeditated<br>Aggression |                              |                               |                               |
|-------------------------------|--------------------------------|-------------------------------|--------------------------------|-------------------------------|-------------------------------|------------------------------------------|------------------------------|-------------------------------|-------------------------------|
|                               | 1                              | 2                             | 3                              | 4                             | 5                             | 6                                        | 7                            | 8                             | 9                             |
| <b>Patients</b>               |                                |                               |                                |                               |                               |                                          |                              |                               |                               |
| 1. Negative Urgency           | --                             |                               |                                |                               |                               |                                          |                              |                               |                               |
| 2. Positive Urgency           | <b>.67<sup>***</sup></b><br>30 | --                            |                                |                               |                               |                                          |                              |                               |                               |
| 3. Premeditated               | -.12<br>30                     | -.06<br>30                    | --                             |                               |                               |                                          |                              |                               |                               |
| 4. Perverserance              | .14<br>30                      | .17<br>30                     | <b>.58<sup>***</sup></b><br>30 | --                            |                               |                                          |                              |                               |                               |
| 5. Sensation Seeking          | .32 <sup>+</sup><br>30         | .32 <sup>+</sup><br>30        | -.31 <sup>+</sup><br>30        | -.22<br>30                    | --                            |                                          |                              |                               |                               |
| 6. Impulsive Aggression       | <b>.48<sup>**</sup></b><br>27  | .25<br>27                     | -.21<br>27                     | <b>-.38<sup>*</sup></b><br>27 | .32 <sup>+</sup><br>27        | --                                       |                              |                               |                               |
| 7. Premeditated Aggression    | .27<br>27                      | .07<br>27                     | -.15<br>27                     | -.33 <sup>+</sup><br>27       | .00<br>27                     | <b>.66<sup>***</sup></b><br>27           | --                           |                               |                               |
| 8. Aggression Questionnaire   | <b>.58<sup>***</sup></b><br>30 | <b>.52<sup>**</sup></b><br>30 | -.23<br>30                     | .05<br>30                     | .24<br>30                     | <b>.54<sup>**</sup></b><br>27            | <b>.44<sup>*</sup></b><br>27 | --                            |                               |
| 9. Life History of Aggression | <b>.43<sup>+</sup></b><br>21   | .30<br>21                     | -.10<br>21                     | -.10<br>21                    | .36 <sup>+</sup><br>21        | .40 <sup>+</sup><br>19                   | .17<br>19                    | <b>.58<sup>**</sup></b><br>21 | --                            |
| 10. PANSS Positive            | .15<br>23                      | .04<br>23                     | -.07<br>23                     | -.03<br>23                    | -.03<br>23                    | .05<br>21                                | <b>.45<sup>*</sup></b><br>21 | .13<br>23                     | .23<br>18                     |
| 11. PANSS Negative            | -.38 <sup>+</sup><br>23        | -.07<br>23                    | .37 <sup>+</sup><br>23         | .14<br>23                     | <b>-.42<sup>*</sup></b><br>23 | .37 <sup>+</sup><br>21                   | -.19<br>21                   | <b>-.46<sup>+</sup></b><br>23 | <b>-.52<sup>+</sup></b><br>18 |
| <b>Controls</b>               |                                |                               |                                |                               |                               |                                          |                              |                               |                               |
| 1. Negative Urgency           | --                             |                               |                                |                               |                               |                                          |                              |                               |                               |
| 2. Positive Urgency           | <b>.80<sup>***</sup></b><br>28 | --                            |                                |                               |                               |                                          |                              |                               |                               |
| 3. Premeditated               | .10<br>28                      | .01<br>28                     | --                             |                               |                               |                                          |                              |                               |                               |
| 4. Perverserance              | .24<br>28                      | .10<br>28                     | <b>.62<sup>***</sup></b><br>28 | --                            |                               |                                          |                              |                               |                               |
| 5. Sensation Seeking          | .30<br>28                      | .32 <sup>+</sup><br>28        | -.31 <sup>+</sup><br>28        | <b>-.37<sup>*</sup></b><br>28 | --                            |                                          |                              |                               |                               |
| 6. Impulsive Aggression       | .31<br>24                      | .15<br>24                     | -.11<br>24                     | .06<br>24                     | .05<br>24                     | --                                       |                              |                               |                               |
| 7. Premeditated Aggression    | .07<br>24                      | -.03<br>24                    | -.29<br>24                     | -.15<br>24                    | .12<br>24                     | <b>.64<sup>***</sup></b><br>25           |                              |                               |                               |
| 8. Aggression Questionnaire   | <b>.51<sup>***</sup></b><br>28 | <b>.48<sup>**</sup></b><br>28 | -.06<br>28                     | .09<br>28                     | <b>.49<sup>**</sup></b><br>28 | .24<br>25                                | .10<br>25                    | --                            |                               |
| 9. Life History of Aggression | .32<br>25                      | <b>.51<sup>**</sup></b><br>25 | .09<br>25                      | .01<br>25                     | <b>.41<sup>+</sup></b><br>25  | .07<br>21                                | -.05<br>21                   | <b>.57<sup>**</sup></b><br>25 | --                            |

Note: <sup>\*\*\*</sup>p<.001, <sup>\*\*</sup>p<.01, <sup>\*</sup>p<.05, <sup>+</sup>p<.10. Top of each row shows correlation, bottom shows *df*. Statistically significant correlations are in **bold**.

**Table S2. Group differences in resting state functional connectivity for inferior frontal ROIs**

| Seed                               | Connected Region                                                | Coordinate <sup>a</sup> | Size <sup>b</sup> | Z    | p                     |
|------------------------------------|-----------------------------------------------------------------|-------------------------|-------------------|------|-----------------------|
| <b>Controls &gt; Patients</b>      |                                                                 |                         |                   |      |                       |
| Left lateral orbitofrontal cortex  | Left superior frontal gyrus/BA 10                               | -9,69,18                | 342               | 3.90 | .00021                |
|                                    | Right insula/BA 13, 22                                          | 45,-6,3                 | 266               | 3.48 | .0015                 |
|                                    | Right caudate                                                   | 21,-42,15               | 196               | 3.83 | .011                  |
| Left medial orbitofrontal cortex   | Right precentral gyrus, BA 4                                    | 18,-27,60               | 907               | 3.78 | 5.96x10 <sup>-8</sup> |
|                                    | Left superior temporal gyrus, inferior parietal lobule/BA 42,40 | -63,-33,21              | 441               | 4.14 | .00019                |
|                                    | Right insula                                                    | 33,15,6                 | 408               | 4.19 | .00036                |
|                                    | Right inferior parietal lobule                                  | 57,-24,24               | 218               | 3.50 | .021                  |
| Left rostral anterior cingulate    | Right paracentral lobule/BA 31                                  | 3,-21,45                | 1392              | 4.06 | 6.65x10 <sup>-9</sup> |
|                                    | Right superior temporal gyrus, insula/BA 22, 13                 | 48,6,0                  | 636               | 3.77 | 6.46x10 <sup>-5</sup> |
|                                    | Left inferior parietal lobule/BA 40                             | -63,-27,24              | 562               | 3.56 | .00019                |
| Right lateral orbitofrontal cortex | Right medial frontal gyrus/BA 10                                | 3,45,12                 | 236               | 4.02 | .0032                 |
|                                    | Right superior frontal gyrus/BA 10                              | 21,60,-6                | 180               | 4.01 | .0167                 |
| Right medial orbitofrontal cortex  | Right postcentral gyrus/BA 3                                    | 21,-27,60               | 1236              | 4.35 | 1.48x10 <sup>-9</sup> |
|                                    | Right precentral gyrus/BA 6                                     | 51,-6,6                 | 556               | 4.50 | 3.37x10 <sup>-5</sup> |
|                                    | Left superior temporal gyrus/BA 42                              | -60,-33,18              | 206               | 4.64 | .033                  |
| Right rostral anterior cingulate   | Right superior temporal gyrus/inferior frontal                  | 39,9,-12                | 922               | 4.32 | 3.58x10 <sup>-7</sup> |
|                                    | Right cingulate/paracentral lobule, BA 31                       | 3,-24,42                | 682               | 3.78 | 1.05x10 <sup>-5</sup> |
|                                    | Left anterior cingulate/BA 32                                   | -6,39,18                | 379               | 4.04 | .0015                 |
| <b>Patients &gt; Controls</b>      |                                                                 |                         |                   |      |                       |
| Left rostral anterior cingulate    | Right superior frontal gyrus                                    | 9,48,33                 | 381               | 3.81 | .0031                 |
|                                    | Left inferior frontal gyrus/BA 47                               | -51,30,-9               | 242               | 4.18 | .037                  |
| Right lateral orbitofrontal cortex | Right cuneus/BA 18                                              | 12,-81,27               | 274               | 3.71 | .0011                 |
| Right medial orbitofrontal cortex  | Right middle occipital gyrus/cuneus/BA 19                       | 24,-99,15               | 291               | 4.04 | .005                  |
|                                    | Left middle occipital gyrus/BA 18                               | -24,-87,18              | 250               | 3.89 | .012                  |

**Note:** Data from 31 patients and 28 controls. <sup>a</sup>Talairach x,y,z coordinate, <sup>b</sup>Voxels, <sup>c</sup>BA = Brodmann area. Effects are significant by Gaussian Random Field correction (p < .05, corrected).

**Table S3. Correlations between positive and negative urgency and resting state functional connectivity for inferior frontal ROIs in A) Patients and B) Controls**

| <b>A) Patients</b>           |                                    |                                           |                               |                         |          |          |
|------------------------------|------------------------------------|-------------------------------------------|-------------------------------|-------------------------|----------|----------|
| <b>Network</b>               | <b>Seed<sup>c</sup></b>            | <b>Connected Region</b>                   | <b>Coordinate<sup>a</sup></b> | <b>Size<sup>b</sup></b> | <b>Z</b> | <b>p</b> |
| <b>Negative Correlations</b> |                                    |                                           |                               |                         |          |          |
| <b>Positive urgency</b>      |                                    |                                           |                               |                         |          |          |
| 1                            | Right frontal pole                 | Right rostral anterior cingulate/BA 32    | 3,36,18                       | 313                     | 4.32     | <.0001   |
| <b>Negative urgency</b>      |                                    |                                           |                               |                         |          |          |
| 2                            | Left lateral orbitofrontal cortex  | Left middle frontal gyrus /BA 11          | -24,36,-3                     | 217                     | 3.90     | .0035    |
|                              |                                    | Left lentiform nucleus                    | -27,6,-3                      | --                      | 3.34     | --       |
| 3                            | Left medial orbitofrontal cortex   | Left superior frontal gyrus/BA 6          | -18,33,57                     | 241                     | 4.12     | .0030    |
|                              |                                    | Left superior frontal gyrus/BA 10         | -21,57,0                      | --                      | 3.81     | --       |
|                              |                                    | Right rostral anterior cingulate/BA 10,32 | 9,42,-6                       | 232                     | 4.11     | .0038    |
|                              |                                    | Left medial frontal gyrus/BA 10           | 0,63,21                       | --                      | 3.48     | --       |
| 4                            | Left rostral anterior cingulate    | Left superior/medial frontal gyrus        | -18,54,6                      | 119                     | 4.09     | .030     |
| <b>Positive Correlations</b> |                                    |                                           |                               |                         |          |          |
| <b>Positive urgency</b>      |                                    |                                           |                               |                         |          |          |
| 5                            | Left frontal pole                  | Right middle occipital gyrus/BA 18        | 27,-81,-9                     | 134                     | 3.73     | .031     |
| <b>Negative urgency</b>      |                                    |                                           |                               |                         |          |          |
| 6                            | Left lateral orbitofrontal cortex  | Right inferior/middle frontal gyrus/BA 9  | 36,9,27                       | 212                     | 4.33     | .0041    |
|                              |                                    | Right middle frontal gyrus/BA 6           | 36,6,57                       | --                      | 2.81     | --       |
|                              |                                    | Left cingulate gyrus/BA 24                | 0,-15,30                      | 160                     | 3.91     | .022     |
|                              |                                    | Right cingulate gyrus                     | 9,-33,33                      | --                      | 3.11     | --       |
| 7                            | Left medial orbitofrontal cortex   | Left precuneus/BA 7                       | -9,-51,54                     | 244                     | 4.02     | .0027    |
| 8                            | Left frontal pole                  | Right superior parietal lobule            | 6,-69,60                      | 135                     | 3.69     | .031     |
| 9                            | Right medial orbitofrontal cortex  | Right cuneus/BA 18                        | 9,-84,15                      | 194                     | 3.37     | .0054    |
| <b>B) Controls</b>           |                                    |                                           |                               |                         |          |          |
| <b>Negative Correlations</b> |                                    |                                           |                               |                         |          |          |
| <b>Positive urgency</b>      |                                    |                                           |                               |                         |          |          |
| 10                           | Right lateral orbitofrontal cortex | Right insula/BA 13                        | 33,-24,12                     | 130                     | 3.69     | .047     |
| <b>Negative urgency</b>      |                                    |                                           |                               |                         |          |          |
| 11                           | Right lateral orbitofrontal cortex | Right insula                              | 36,-18,3                      | 191                     | 4.46     | .012     |
| 1                            | Right frontal pole                 | Right posterior insula                    | 30,-21,15                     | 170                     | 4.07     | .020     |
|                              |                                    | Right postcentral gyrus/BA 42             | 60,-9,15                      | 161                     | 3.29     | .027     |
|                              |                                    |                                           | 60,9,39                       | --                      | 3.29     | --       |
| <b>Positive Correlations</b> |                                    |                                           |                               |                         |          |          |
| <b>Positive urgency</b>      |                                    |                                           |                               |                         |          |          |
| 12                           | Left rostral anterior cingulate    | Left claustrum                            | -33,-12,-6                    | 251                     | 4.16     | .0016    |
|                              |                                    | Left inferior parietal lobule             | -60,-24,27                    | --                      | 3.14     | --       |
| 5                            | Left frontal pole                  | Left putamen                              | -27,3,-6                      | 267                     | 4.41     | .00081   |
|                              |                                    | Left insula                               | -24,-15,18                    | --                      | 3.03     | --       |
| 13                           | Right rostral anterior cingulate   | Left parahippocampal gyrus                | -33,-9,-9                     | 262                     | 4.42     | .0016    |
| <b>Negative urgency</b>      |                                    |                                           |                               |                         |          |          |
| 14                           | Left frontal pole                  | Left putamen                              | -27,3,6                       | 211                     | 4.02     | .0053    |
| 15                           | Right lateral orbitofrontal cortex | Right superior temporal gyrus             | 57,-48,18                     | 153                     | 3.80     | .04      |

**Note:** Data from 31 patients and 28 controls. <sup>a</sup>Talairach x,y,z coordinates, <sup>b</sup>Voxels, <sup>c</sup>BA = Brodmann area, regions without cluster sizes and p-values are local maxima. Effects are significant by Gaussian Random Field correction (p < .05, corrected).
